# Supplementary material for: Historical and future changes in global flood magnitude – evidence from a model–observation investigation
Source: Copernicus journal article supplement (doi:10.5194/hess-24-1543-2020), 2020-04-01
Supplement: Supplementary file 2 [file hess-24-1543-2020-supplement.zip]

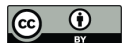

## *Supplement of*

# **Historical and future changes in global flood magnitude – evidence from a model–observation investigation**

**Hong Xuan Do et al.**

*Correspondence to:* Hong Xuan Do ([hong.do@adelaide.edu.au](mailto:hong.do@adelaide.edu.au)) and Fang Zhao ([fangzhao@pik-potsdam.de](mailto:fangzhao@pik-potsdam.de))

- [hess-24-1543-2020-supplement-title-page.pdf](#)
- [floottrend\\_supplementaryData.csv](#)
- [floottrend\\_supplementaryText.pdf](#)

The copyright of individual parts of the supplement might differ from the CC BY 4.0 License.
